# Supplementary material
Source: publisher figshare collection journal article supplement (https://microbiology.figshare.com/articles/dataset/_/8956550)
Supplement: Supplementary file 1 [file 1]

# Phage elements in *E. ictaluri* and *E. piscicida* genomes

|                     |            | Region | Region Length | Completeness | Score | # Total Proteins | Region Position | GC %   |
|---------------------|------------|--------|---------------|--------------|-------|------------------|-----------------|--------|
| <i>E. ictaluri</i>  | 93-146     | 1      | 42.8Kb        | intact       | 130   | 48               | 1916311-1959137 | 56.82% |
|                     |            | 2      | 66.9Kb        | intact       | 150   | 51               | 2128873-2195772 | 54.36% |
|                     |            | 3      | 29.6Kb        | questionable | 70    | 27               | 2182905-2212536 | 49.96% |
|                     |            | 4      | 41.5Kb        | intact       | 150   | 41               | 2995152-3036661 | 54.42% |
|                     | RUSVM-1    | 1      | 6.4Kb         | incomplete   | 30    | 7                | 142018-148508   | 53.15% |
|                     |            | 2      | 7Kb           | incomplete   | 50    | 7                | 173699-180784   | 50.51% |
|                     |            | 3      | 7.8Kb         | incomplete   | 40    | 9                | 679962-687799   | 51.68% |
|                     |            | 4      | 4.4Kb         | incomplete   | 40    | 6                | 739928-744391   | 49.40% |
|                     |            | 5      | 5.1Kb         | incomplete   | 40    | 7                | 1435286-1440484 | 51.59% |
|                     | LADL11 100 | 1      | 41Kb          | intact       | 150   | 52               | 775664-816757   | 52.87% |
|                     |            | 2      | 79.1Kb        | intact       | 150   | 97               | 2604002-2683193 | 55.72% |
|                     |            | 3      | 18.8Kb        | intact       | 120   | 29               | 2995575-3014378 | 55.20% |
|                     |            | 4      | 25.6Kb        | intact       | 150   | 33               | 3059838-3085459 | 55.06% |
|                     |            | 5      | 48.8Kb        | incomplete   | 60    | 28               | 3193073-3241935 | 50.20% |
|                     |            | 6      | 20.1Kb        | incomplete   | 40    | 27               | 3435779-3455917 | 55.13% |
|                     | LADL11 194 | 1      | 40.5Kb        | intact       | 150   | 51               | 944051-984626   | 52.89% |
|                     |            | 2      | 27.8Kb        | intact       | 110   | 41               | 2580426-2608265 | 55.73% |
|                     |            | 3      | 7.6Kb         | incomplete   | 30    | 10               | 2669199-2676822 | 42.25% |
|                     |            | 4      | 7.6Kb         | questionable | 70    | 12               | 2727954-2735639 | 54.71% |
|                     |            | 5      | 50.8Kb        | intact       | 150   | 63               | 3004854-3055674 | 53.51% |
|                     |            | 6      | 16.1Kb        | intact       | 150   | 23               | 3321094-3337290 | 55.66% |
|                     |            | 7      | 43.3Kb        | questionable | 80    | 43               | 3437047-3480357 | 52.58% |
|                     | ATCC 33202 | 1      | 16.6Kb        | questionable | 80    | 20               | 1039454-1056078 | 56.93% |
|                     |            | 2      | 42.9Kb        | intact       | 150   | 53               | 2850254-2893218 | 56.09% |
|                     |            | 3      | 15.9Kb        | intact       | 110   | 17               | 3022119-3038057 | 55.14% |
|                     |            | 4      | 36.9Kb        | intact       | 150   | 43               | 3296738-3333736 | 54.08% |
|                     |            | 5      | 8.1Kb         | incomplete   | 50    | 7                | 3508149-3516338 | 54.21% |
| <i>E. piscicida</i> | C07-087    | 1      | 34.8Kb        | questionable | 90    | 39               | 475182-510078   | 54.49% |
|                     |            | 2      | 32.7Kb        | intact       | 150   | 39               | 2169545-2202251 | 52.21% |
|                     |            | 3      | 54.5Kb        | intact       | 150   | 58               | 2646864-2701384 | 49.79% |
|                     |            | 4      | 19.3Kb        | incomplete   | 40    | 16               | 2912068-2931394 | 49.54% |
|                     |            | 5      | 46.1Kb        | intact       | 120   | 46               | 3693608-3739720 | 56.32% |
|                     | FL6-60     | 1      | 12.8Kb        | incomplete   | 40    | 11               | 864445-877319   | 46.31% |
|                     | pFL6-60    | 1      | 42.1Kb        | intact       | 150   | 61               | 1879-44035      | 51.22% |
|                     | EIB202     | 1      | 22.6Kb        | questionable | 70    | 28               | 1721332-1744014 | 57.63% |
|                     |            | 2      | 24.9Kb        | intact       | 100   | 23               | 2594252-2619164 | 48.75% |
|                     |            | 3      | 12.4Kb        | questionable | 70    | 18               | 3602929-3615366 | 49.83% |
|                     | S11-285    | 1      | 3922.3Kb      | intact       | 150   | 3463             | 1-3922328       | 59.56% |
|                     | ETW41      | 1      | 21.3Kb        | questionable | 80    | 26               | 10590-31982     | 55.68% |
|                     |            | 2      | 34.8Kb        | intact       | 100   | 32               | 825219-860039   | 55.47% |
|                     |            | 3      | 10.4Kb        | incomplete   | 40    | 11               | 1862180-1872670 | 48.94% |
|                     |            | 4      | 17Kb          | questionable | 70    | 13               | 2152027-2169108 | 48.64% |
|                     |            | 5      | 48.3Kb        | intact       | 150   | 53               | 2860874-2909222 | 51.50% |
|                     |            | 6      | 15.3Kb        | incomplete   | 60    | 16               | 3763955-3779349 | 59.82% |
|                     | ACC35.1    | 1      | 77Kb          | intact       | 150   | 45               | 938888-1015983  | 50.36% |
|                     |            | 2      | 35Kb          | questionable | 70    | 33               | 1834610-1869631 | 58.88% |
|                     |            | 3      | 31.2Kb        | intact       | 150   | 32               | 2160116-2191319 | 53.86% |
|                     |            | 4      | 25.8Kb        | intact       | 150   | 21               | 2779550-2805395 | 49.09% |
|                     | JF1305     | 1      | 16.6Kb        | incomplete   | 50    | 23               | 135363-152044   | 55.62% |
|                     |            | 2      | 19Kb          | questionable | 80    | 9                | 2414375-2433379 | 50.05% |
|                     | ET883      | 1      | 15.9Kb        | questionable | 80    | 19               | 660766-676733   | 46.00% |
|                     |            | 2      | 40.4Kb        | intact       | 150   | 42               | 1339119-1379552 | 55.83% |
|                     |            | 3      | 14.7Kb        | questionable | 70    | 21               | 2056742-2071466 | 56.48% |
|                     |            | 4      | 37.6Kb        | incomplete   | 50    | 15               | 2718710-2756382 | 57.48% |
|                     |            | 5      | 18.8Kb        | intact       | 110   | 21               | 3549872-3568702 | 53.25% |
|                     |            | 6      | 37.5Kb        | questionable | 90    | 30               | 3700226-3737792 | 56.12% |
|                     |            | 7      | 100.5Kb       | intact       | 150   | 118              | 3728052-3828586 | 53.16% |
