# Supplementary material
Source: publisher figshare collection journal article supplement (https://microbiology.figshare.com/articles/dataset/_/8956550)
Supplement: Supplementary file 2 [file 1]

# Genome structure variation

Table. List of gene variation encoded in the thirteen *Edwardsiella* sp. genomes.

|                                     |                                                  | <i>E. ictaluri</i><br>93-146 | <i>E. ictaluri</i><br>LADL11-100 | <i>E. ictaluri</i><br>LADL11-194 | <i>E. ictaluri</i><br>ATCC33202 | <i>E. ictaluri</i><br>RUSVM-1 | <i>E. piscicida</i><br>C07-087 | <i>E. piscicida</i><br>ACC35.1 | <i>E. piscicida</i><br>ETW41 | <i>E. piscicida</i><br>JF1305 | <i>E. piscicida</i><br>S11-285 | <i>E. tarda</i><br>EIB202 | <i>E. tarda</i><br>ET883 | <i>E. tarda</i><br>FL6-60 |
|-------------------------------------|--------------------------------------------------|------------------------------|----------------------------------|----------------------------------|---------------------------------|-------------------------------|--------------------------------|--------------------------------|------------------------------|-------------------------------|--------------------------------|---------------------------|--------------------------|---------------------------|
| <i>E. ictaluri</i> specific         | Urea transporter                                 | NT01EI_<br>RS08985           | ABY58_<br>16655                  | ACS33_<br>16715                  | EIEH_<br>RS04010                | B6E78_<br>RS02900             | -                              | -                              | -                            | -                             | -                              | -                         | -                        | -                         |
|                                     | Urease accessory<br>protein UreD                 | NT01EI_<br>RS08990           | ABY58_<br>15600                  | ACS33_<br>15500                  | EIEH_<br>RS04015                | B6E78_<br>RS02915             | -                              | -                              | -                            | -                             | -                              | -                         | -                        | -                         |
|                                     | Urease accessory<br>protein UreG                 | NT01EI_<br>RS08995           | ABY58_<br>15605                  | ACS33_<br>15505                  | EIEH_<br>RS04020                | B6E78_<br>RS02920             | -                              | -                              | -                            | -                             | -                              | -                         | -                        | -                         |
|                                     | Urease accessory<br>protein UreF                 | NT01EI_<br>RS09000           | ABY58_<br>15610                  | ACS33_<br>15510                  | EIEH_<br>RS04025                | B6E78_<br>RS02925             | -                              | -                              | -                            | -                             | -                              | -                         | -                        | -                         |
|                                     | Urease accessory<br>protein UreE                 | NT01EI_<br>RS18150           | ABY58_<br>15615                  | ACS33_<br>15515                  | EIEH_<br>RS17285                | B6E78_<br>RS02930             | -                              | -                              | -                            | -                             | -                              | -                         | -                        | -                         |
|                                     | Urease subunit alpha<br>UreC                     | NT01EI_<br>RS09010           | ABY58_<br>15620                  | ACS33_<br>15520                  | EIEH_<br>RS04035                | B6E78_<br>RS02935             | -                              | -                              | -                            | -                             | -                              | -                         | -                        | -                         |
|                                     | Urease subunit beta<br>UreB                      | NT01EI_<br>RS09015           | ABY58_<br>15625                  | ACS33_<br>15525                  | EIEH_<br>RS04040                | B6E78_<br>RS02935             | -                              | -                              | -                            | -                             | -                              | -                         | -                        | -                         |
|                                     | Urease subunit gamma<br>UreA                     | NT01EI_<br>RS09020           | ABY58_<br>15630                  | ACS33_<br>15530                  | EIEH_<br>RS04045                | B6E78_<br>RS02945             | -                              | -                              | -                            | -                             | -                              | -                         | -                        | -                         |
|                                     | Protoheme IX<br>farnesyltransferase              | NT01EI_<br>RS09660           | ABY58_<br>16380                  | ACS33_<br>16620                  | EIEH_<br>RS04270                | B6E78_<br>RS03595             | -                              | -                              | -                            | -                             | -                              | -                         | -                        | -                         |
|                                     | Cytochrome o<br>ubiquinol oxidase<br>subunit IV  | NT01EI_<br>RS09665           | ABY58_<br>16375                  | ACS33_<br>16610                  | EIEH_<br>RS04265                | B6E78_<br>RS03600             | -                              | -                              | -                            | -                             | -                              | -                         | -                        | -                         |
|                                     | Cytochrome o<br>ubiquinol oxidase<br>subunit III | NT01EI_<br>RS09670           | ABY58_<br>16370                  | ACS33_<br>16605                  | EIEH_<br>RS04260                | B6E78_<br>RS03605             | -                              | -                              | -                            | -                             | -                              | -                         | -                        | -                         |
|                                     | Cytochrome o<br>ubiquinol oxidase<br>subunit I   | NT01EI_<br>RS09675           | ABY58_<br>16365                  | ACS33_<br>16600                  | EIEH_<br>RS04255                | B6E78_<br>RS03610             | -                              | -                              | -                            | -                             | -                              | -                         | -                        | -                         |
|                                     | Cytochrome o<br>ubiquinol oxidase<br>subunit II  | NT01EI_<br>RS09680           | ABY58_<br>16360                  | ACS33_<br>16595                  | EIEH_<br>RS04250                | B6E78_<br>RS03615             | -                              | -                              | -                            | -                             | -                              | -                         | -                        | -                         |
| <i>E. ictaluri</i> non-<br>specific | Tetrathionate<br>reductase subunit B             | -                            | -                                | -                                | -                               | -                             | ETAC_<br>RS07565               | BRD58_<br>RS08685              | BXA22_<br>RS17320            | HI13_contig00045-<br>0003     | A9797_<br>RS08025              | ETAE_<br>RS07780          | KP73_<br>RS03925         | ETAF_<br>RS07530          |
|                                     | Tetrathionate<br>reductase subunit C             | -                            | -                                | -                                | -                               | -                             | ETAC_<br>RS07570               | BRD58_<br>RS08690              | BXA22_<br>RS17315            | HI13_contig00045-<br>0002     | A9797_<br>RS08030              | ETAE_<br>RS07785          | KP73_<br>RS03930         | ETAF_<br>RS 07535         |
|                                     | Tetrathionate<br>reductase subunit A             | -                            | -                                | -                                | -                               | -                             | ETAC_<br>RS07575               | BRD58_<br>RS08695              | BXA22_<br>RS17310            | HI13_contig00045-<br>0001     | A9797_<br>RS08035              | ETAE_<br>RS07790          | KP73_<br>RS03935         | ETAF_<br>RS07540          |

|                                                  |   |   |   |   |   |              |               |               |                       |               |              |              |              |
|--------------------------------------------------|---|---|---|---|---|--------------|---------------|---------------|-----------------------|---------------|--------------|--------------|--------------|
| Capsular polysaccharide synthesis enzyme CpsB    | - | - | - | - | - | ETAC_RS08925 | BRD58_RS10215 | BXA22_RS16010 | HI13_contig00004-0080 | A9797_RS09320 | ETAE_RS09080 | KP73_RS06285 | ETAF_RS08820 |
| Capsular polysaccharide synthesis enzyme CpsC    | - | - | - | - | - | ETAC_RS08930 | BRD58_RS10220 | BXA22_RS16005 | HI13_contig00004-0081 | A9797_RS09325 | ETAE_RS09085 | KP73_RS06290 | ETAF_RS08825 |
| Capsular polysaccharide synthesis enzyme CpsD    | - | - | - | - | - | ETAC_RS08935 | BRD58_RS10225 | BXA22_RS16000 | HI13_contig00004-0082 | A9797_RS09330 | ETAE_RS09090 | KP73_RS06295 | ETAF_RS08830 |
| Capsular polysaccharide biosynthesis protein     | - | - | - | - | - | ETAC_RS08940 | BRD58_RS10230 | BXA22_RS15995 | HI13_contig00004-0083 | A9797_RS09335 | ETAE_RS09095 | KP73_RS06300 | ETAF_RS08835 |
| Vibrioferriin ligase/carboxylase PvsA            | - | - | - | - | - | ETAC_RS09010 | BRD58_RS10300 | BXA22_RS15925 | HI13_contig00004-0097 | A9797_RS09405 | ETAE_RS09165 | KP73_RS06370 | ETAF_RS08905 |
| Vibrioferriin amide bond forming protein PvsB    | - | - | - | - | - | ETAC_RS09015 | BRD58_RS10305 | BXA22_RS15920 | HI13_contig00004-0098 | A9797_RS09410 | ETAE_RS09170 | KP73_RS06375 | ETAF_RS08910 |
| Vibrioferriin membrane-spanning transporter PvsC | - | - | - | - | - | ETAC_RS09020 | BRD58_RS10310 | BXA22_RS15915 | HI13_contig00004-0099 | A9797_RS09415 | ETAE_RS09175 | KP73_RS14940 | ETAF_RS08915 |
| Vibrioferriin amide bond forming protein PvsD    | - | - | - | - | - | ETAC_RS09025 | BRD58_RS10315 | BXA22_RS15910 | HI13_contig00004-0100 | A9797_RS09420 | ETAE_RS09180 | KP73_RS14935 | ETAF_RS08920 |
| Vibrioferriin decarboxylase PvsE                 | - | - | - | - | - | ETAC_RS09030 | BRD58_RS10320 | BXA22_RS15905 | HI13_contig00004-0101 | A9797_RS09425 | ETAE_RS09185 | KP73_RS14930 | ETAF_RS08925 |
