# Supplementary material
Source: publisher figshare collection journal article supplement (https://microbiology.figshare.com/articles/dataset/_/8956550)

# Genomic islands

Supplementary file-4A

## ***Edwardsiella ictaluri* genomic islands**

A-*Edwardsiella ictaluri* RUSVM1, B-*Edwardsiella ictaluri* ATCC 33202

C-*Edwardsiella ictaluri* LADL11-100, D-*Edwardsiella ictaluri* LADL11-194

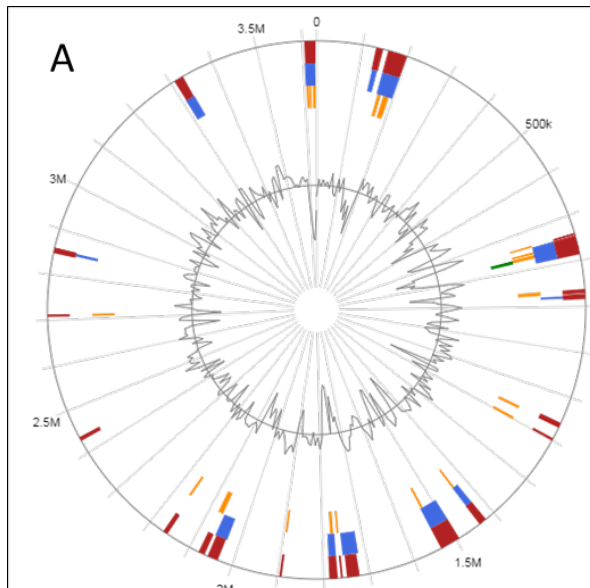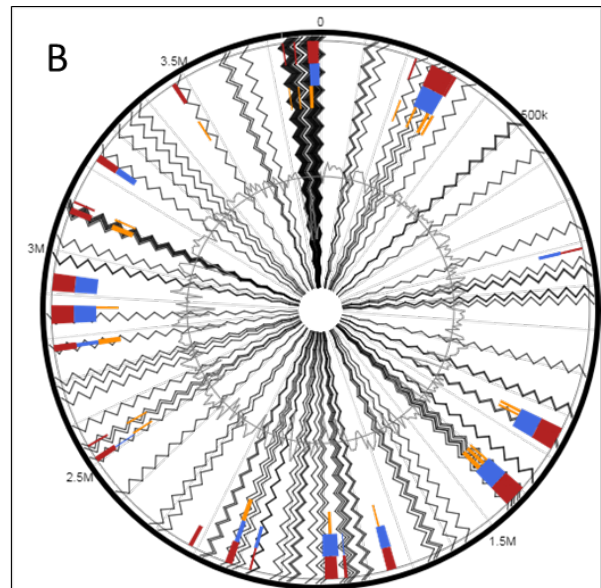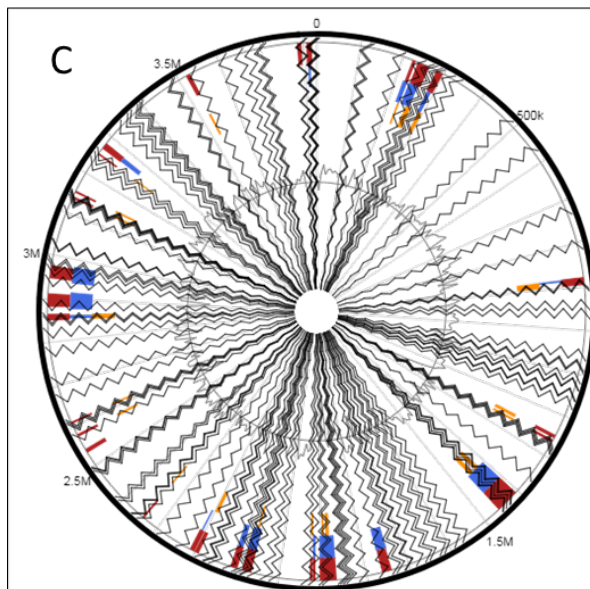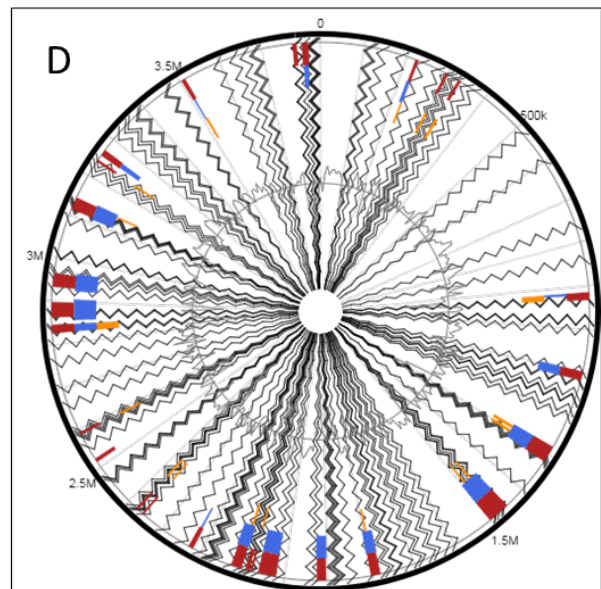

***Edwardsiella piscicida* genomes genomic islands**

E- *Edwardsiella piscicida* ACC351, F- *Edwardsiella piscicida* ETW41, G- *Edwardsiella piscicida* JF1305

H- *Edwardsiella piscicida* S11-285, I- *Edwardsiella tarda* EIB202, J- *Edwardsiella tarda* ET883

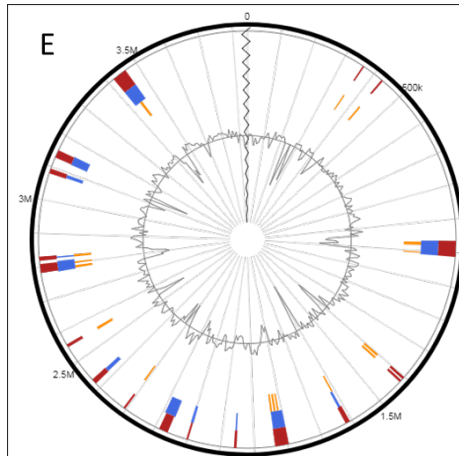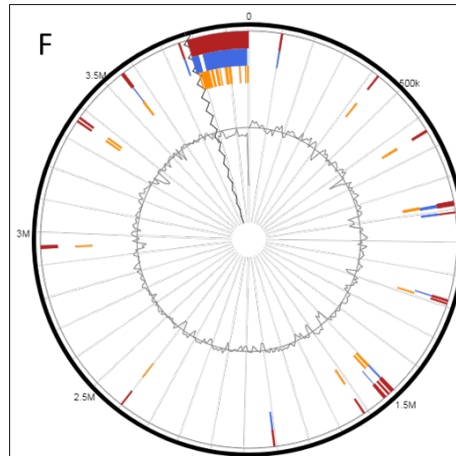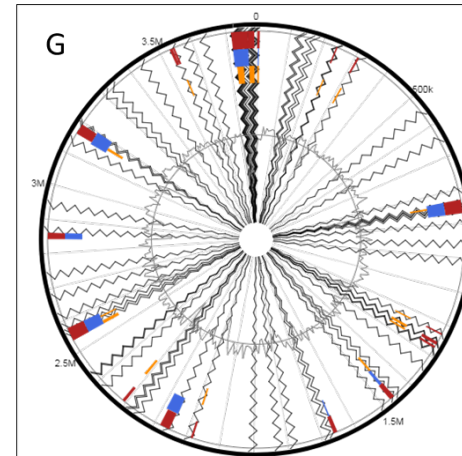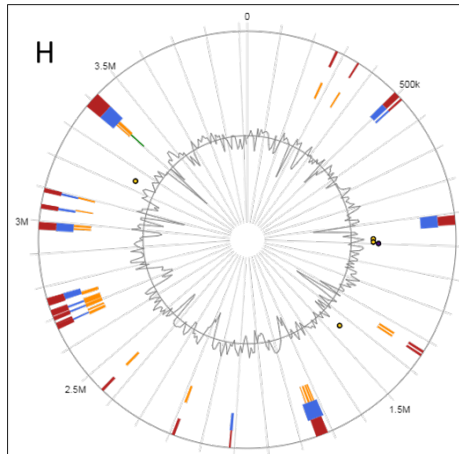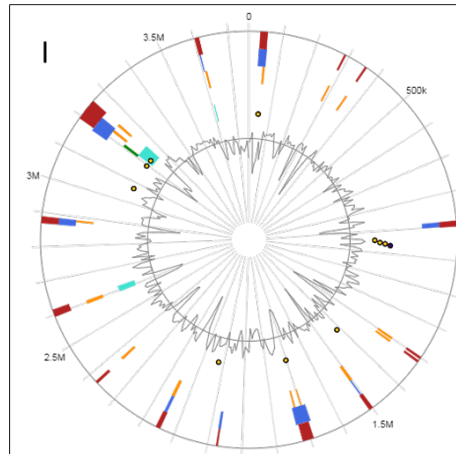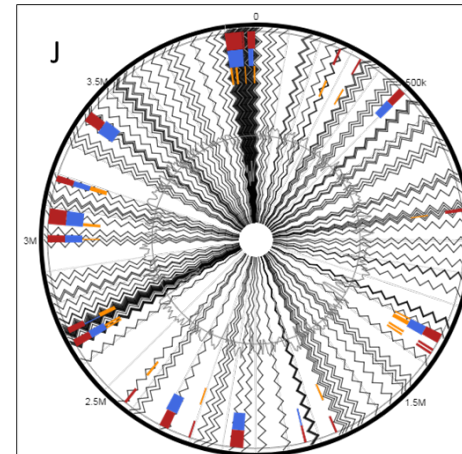

Supplement: Supplementary file 3 [file 1]
